# Supplementary material for: Explainable multiview framework for dissecting spatial relationships from highly multiplexed data
Source: PubMed Central journal article supplement (PMC9011939; doi:10.1186/s13059-022-02663-5), 2022-04-14
Supplement: 13059_2022_2663_MOESM1_ESM.pdf [file 13059_2022_2663_MOESM1_ESM.pdf]

## **Additional file 1**

Supplementary figures and tables to the manuscript *Explainable multi-view framework for dissecting spatial relationships from highly multiplexed data*.

Figures S1 to S9.

Tables S1 and S2.

A

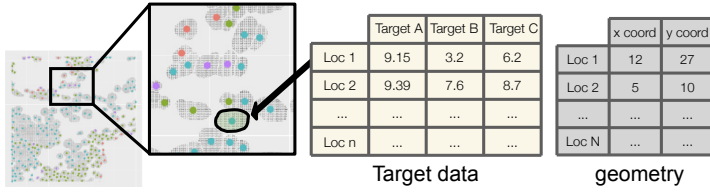

B

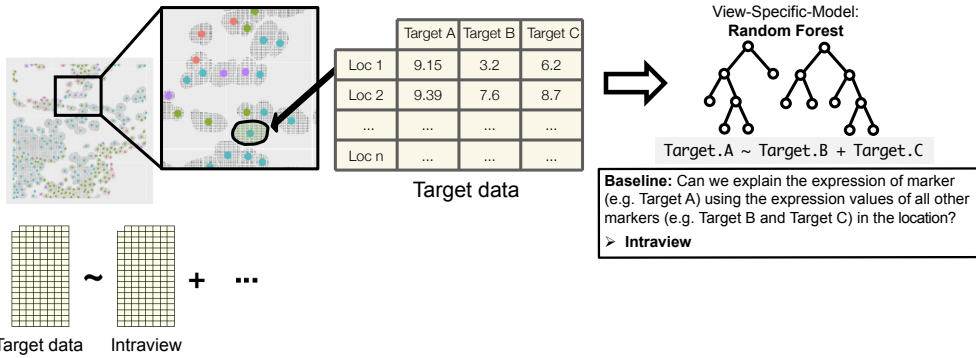

C

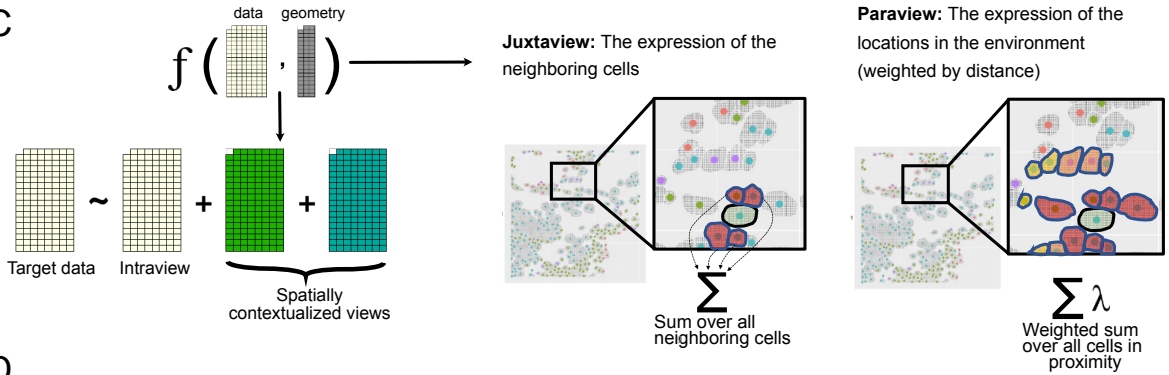

D

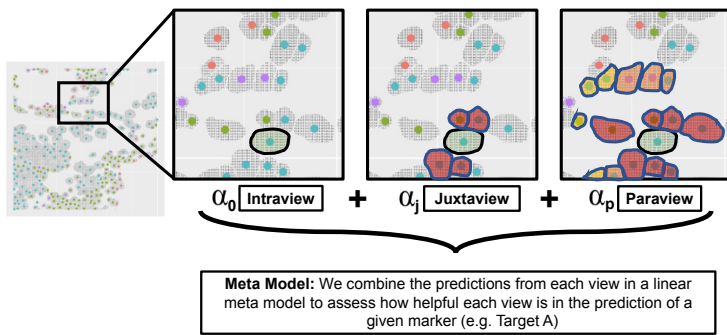

E

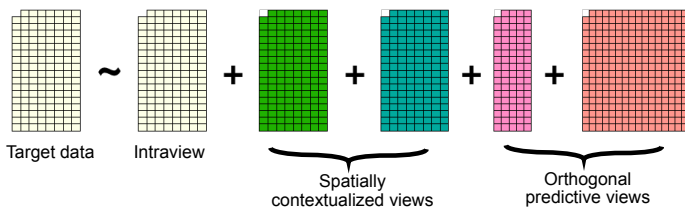

F

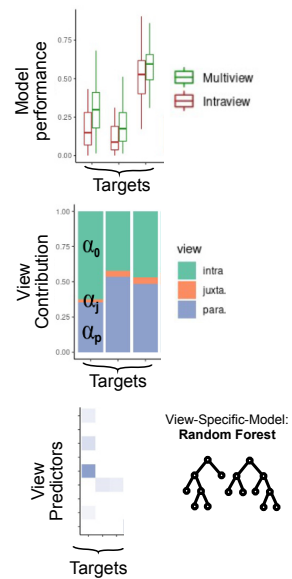

**Fig. S1. MISTy view composition and modeling.** (A) The input for MISTy is a matrix of marker expressions and the location of each spatial unit. (B) The intraview consists of the matrix of marker expression. The intraview specific model, relates the expression of all other markers to a target marker within the same spatial location (cell/spot/spatial unit). The model used in our work to learn these relations is Random Forest. We use the intraview as a baseline as we expect most of the information to come from the same location and we want to be able to distinguish all other relationships that come from outside of this view. (C) MISTy allows for composing views that capture different spatial contexts. For example the juxtaview captures the local cellular niche (immediate neighborhood) by the sum of the expression of all markers of the direct neighbors of the spatial unit. The paraview captures the broader tissue structure by a weighted sum of the expression of all markers in the tissue. The closer a spatial unit is, the more weight is given to the expression coming from that unit. (D) After training models for each view, i.e., relating the expression of the variables in that specific view to the expression of the target marker as given in the intraview, their predictions are combined by a linear meta model. (E) MISTy is flexible and allows for adding as many views as needed capturing different spatial contexts or orthogonal information. (F) MISTy generates three general outputs. The first gives information about the amount of information that is gained when considering multiple views in contrast to the intraview only. The second gives information about the contributions of each view, as captured by the parameters of the meta-model. The third gives an insight into the predictor-target relationships that were found to be most important for each view.

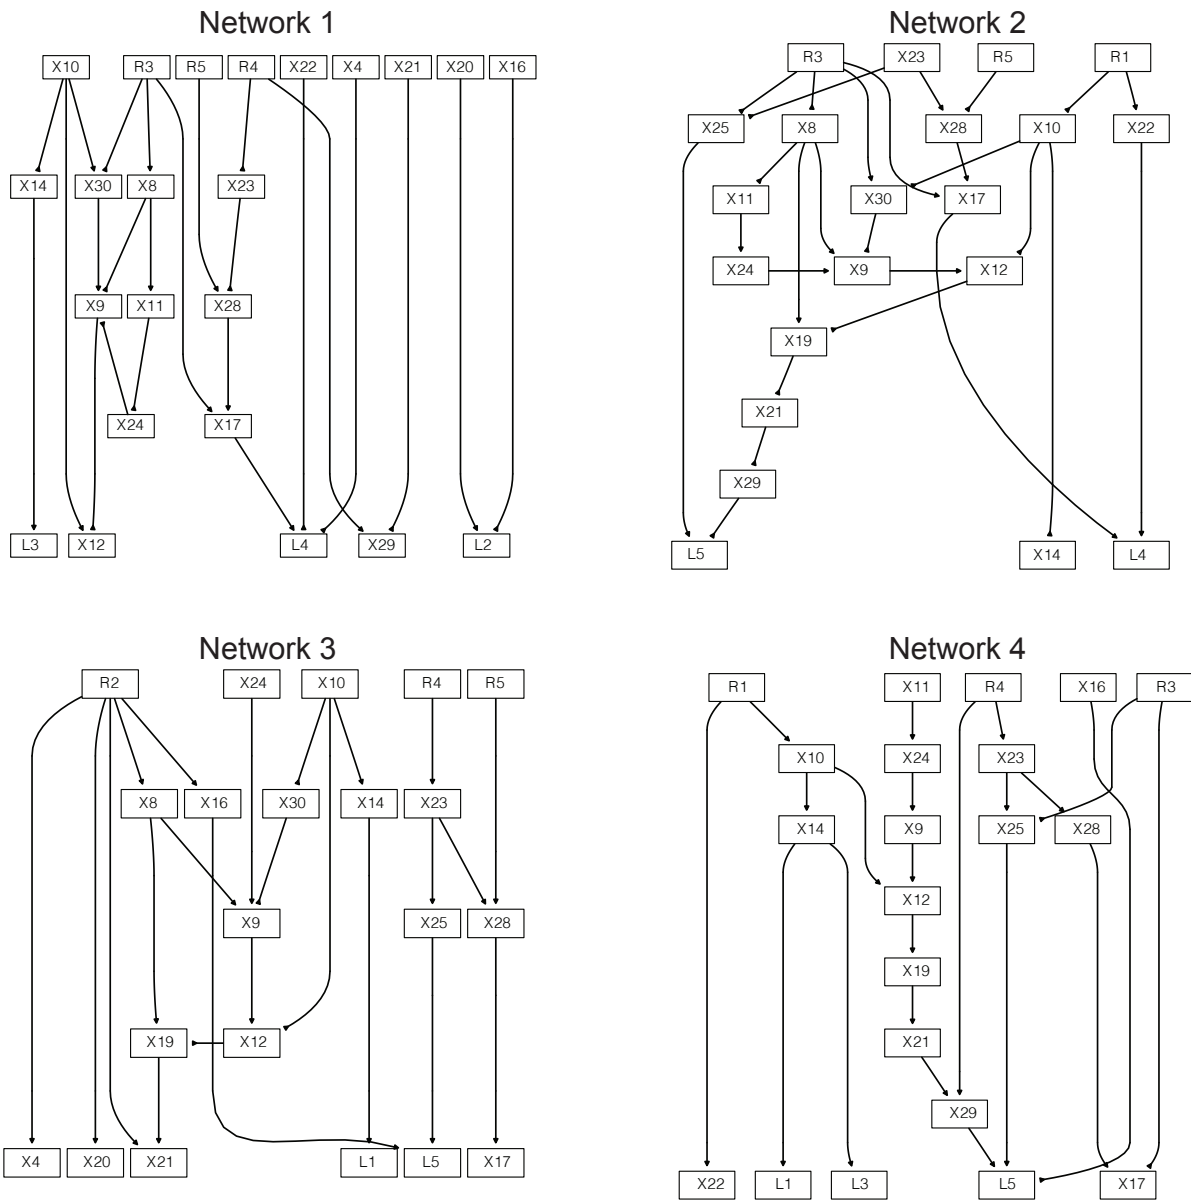

**Fig. S2. Intracellular signaling networks used in the mechanistic in silico models.**

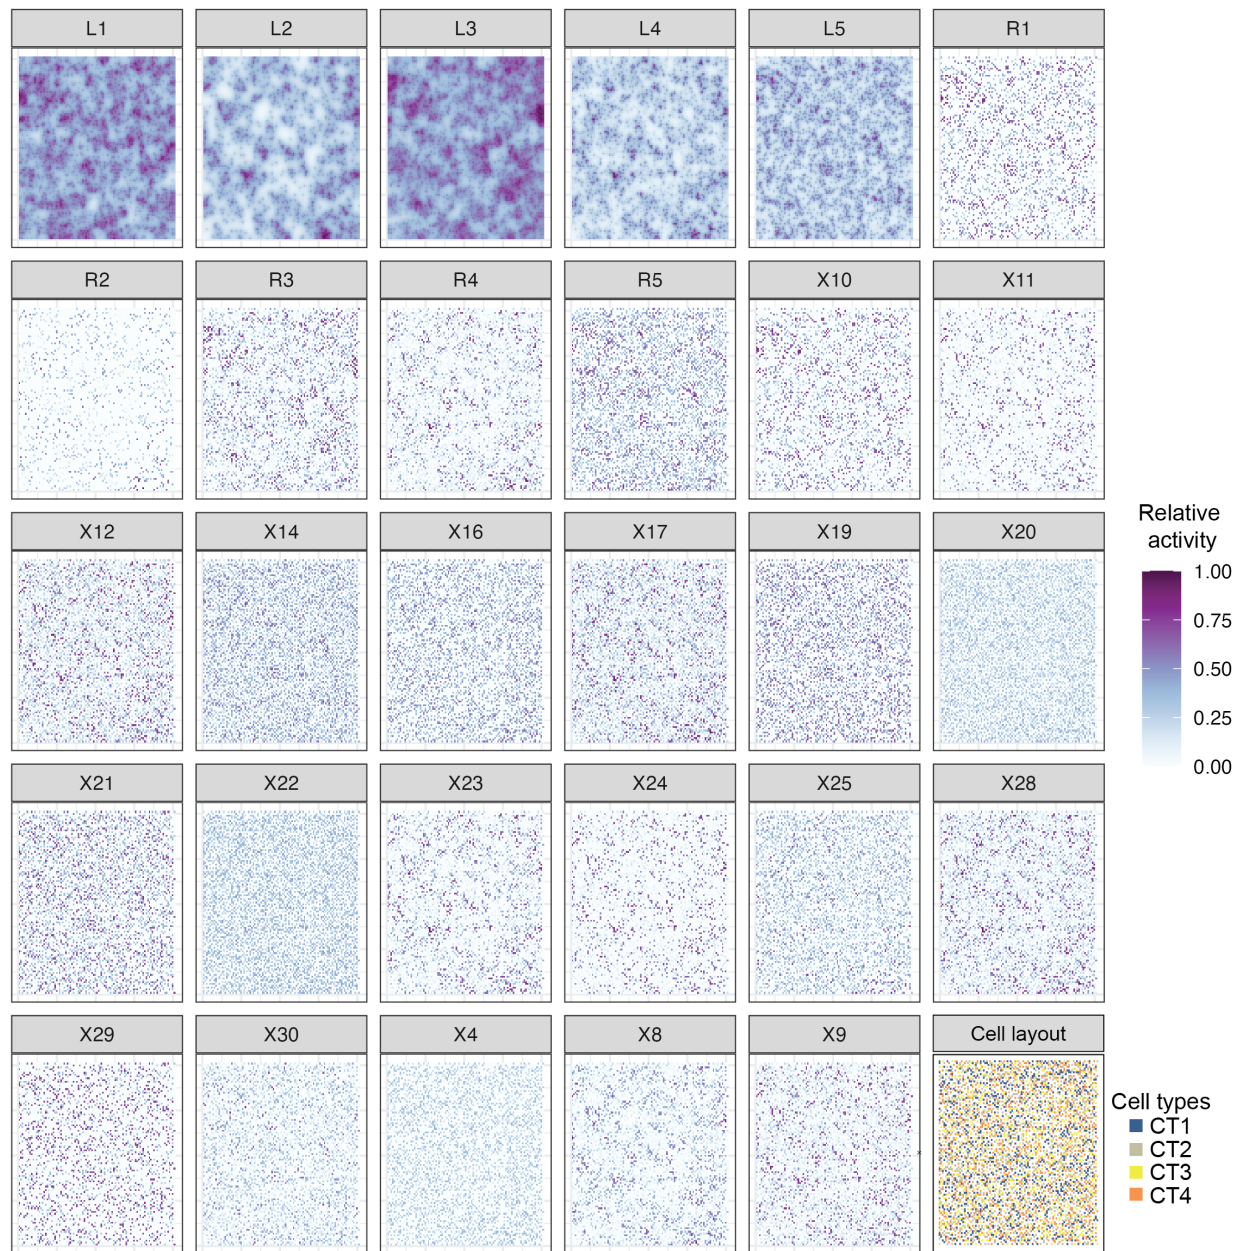

**Fig. S3. In silico simulation results from a single sample.** The panels show the distribution of ligands (L1-L5), activity of receptors (R1-R5) and activity of intracellular signaling nodes (X10-X30). The last panel shows the layout of the four cell types.

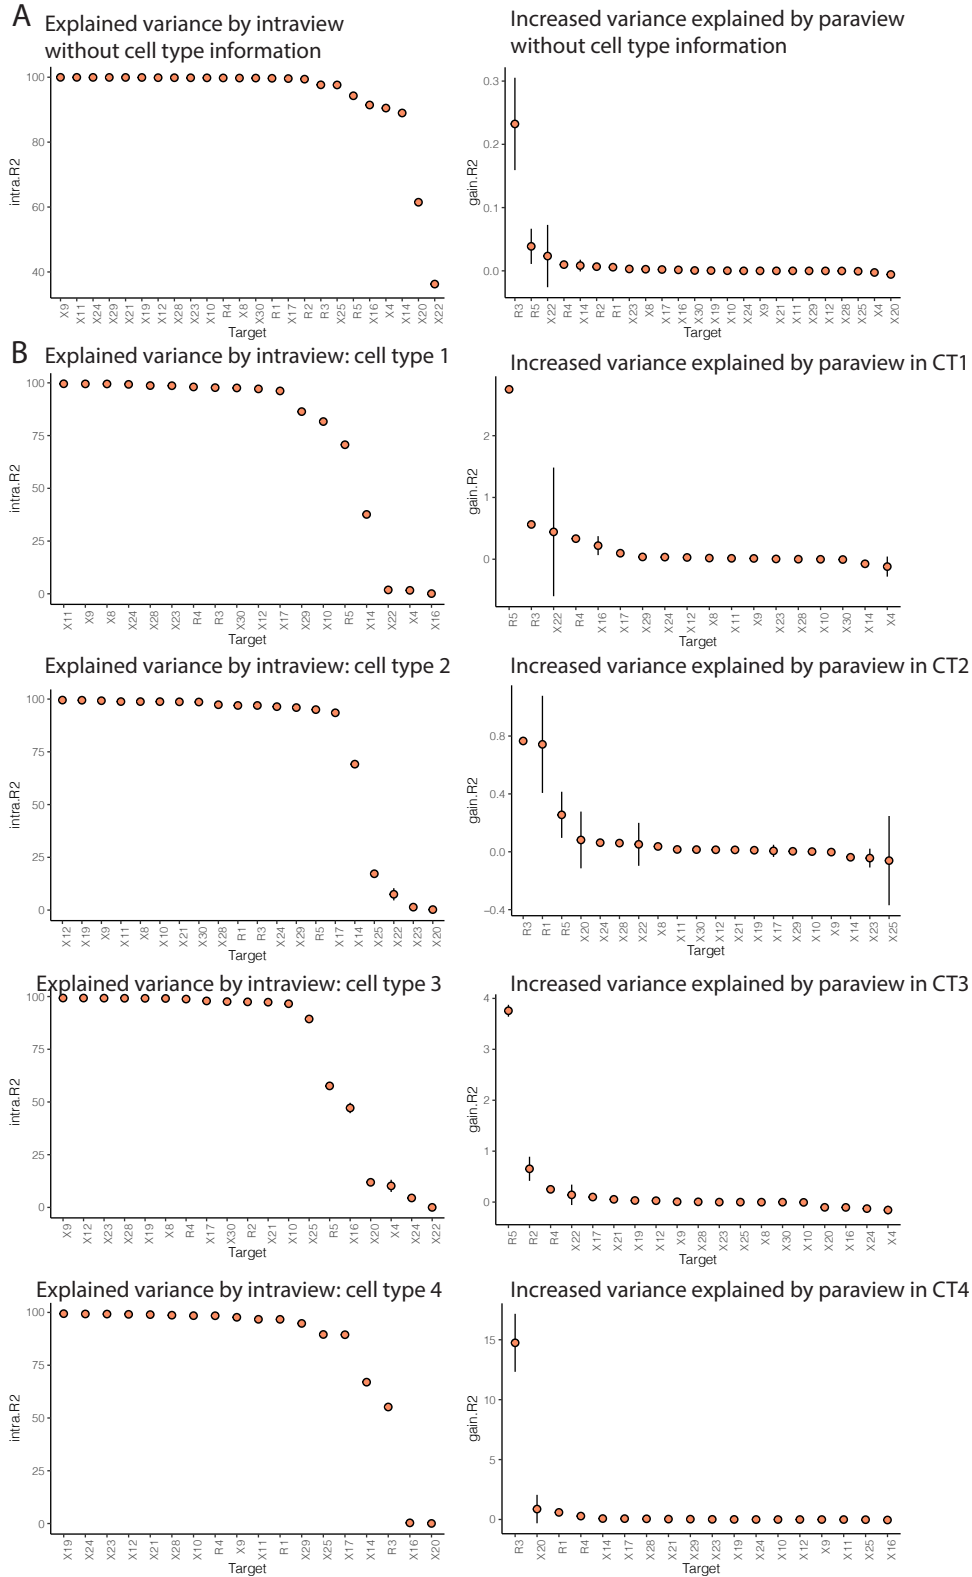

**Fig. S4. Explained variance of nodes by the intraview (left) and increased explained variance by the paraview (right) for the scenario without cell type information (panel A) and with cell type information (panel B).**

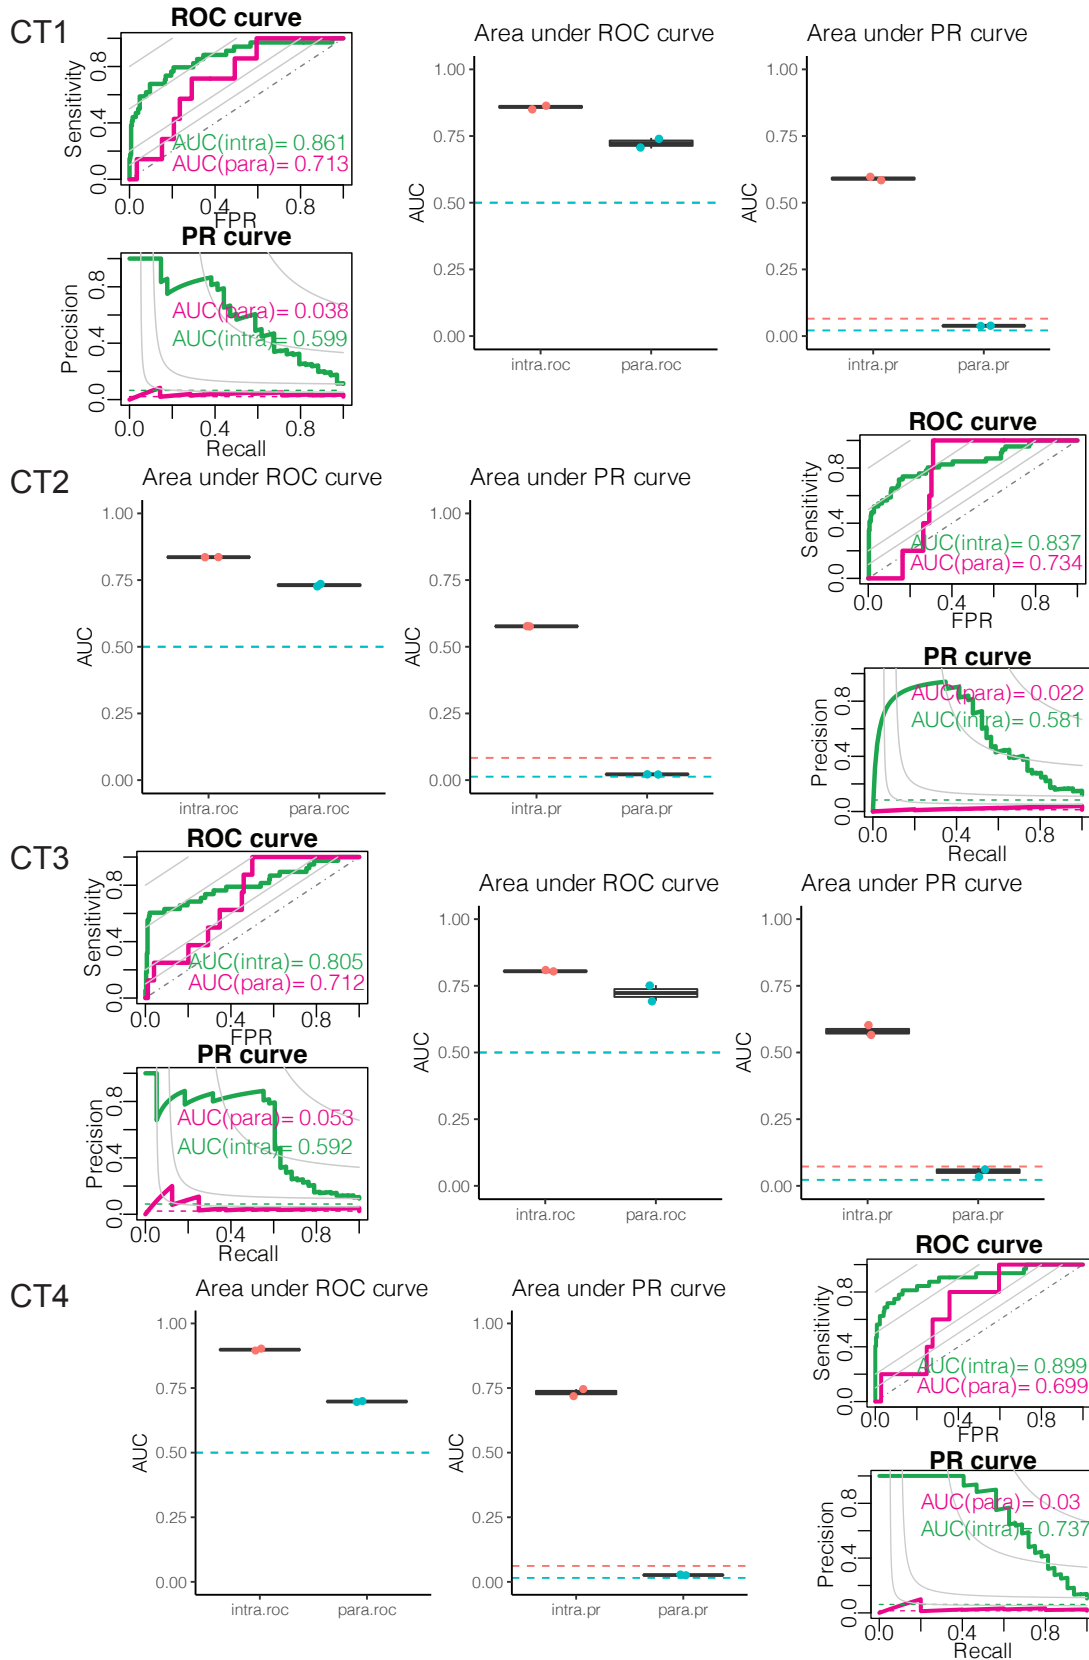

**Fig. S5.** Distribution of Area Under the Precision-Recall curves (AUPRC) and Receiver-Operating Characteristic curves (AUROC) for the *in silico* case study, for each cell type (CT1 - CT4).

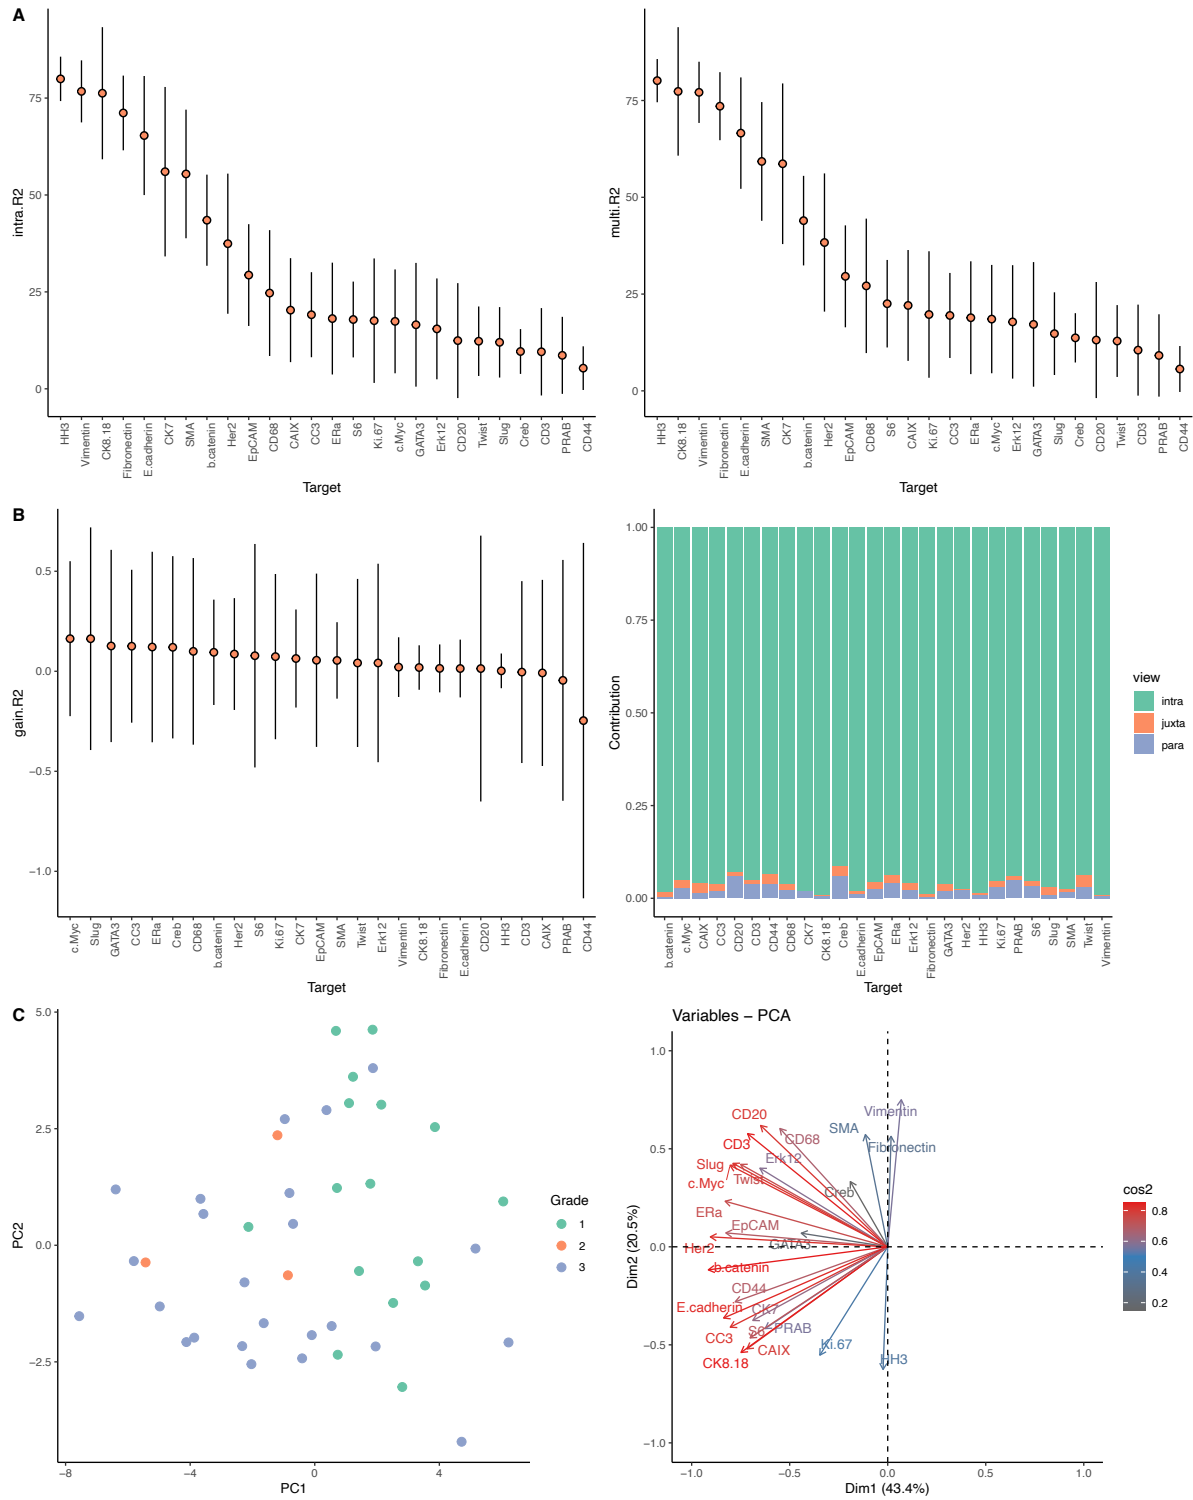

**Fig. S6. Additional plots for the IMC data from 46 breast cancer samples.** (A) Predictive performance, in absolute percentage points of variance explained for all samples when considering intraview only (left) and all views together (right). (B) Gain in variance explained and relative contribution of each view to the prediction of the expression of the markers for samples with 10 random permutations of the cell locations. (C) First two principal components of the samples, when represented by the mean expression of the markers across all cells and the importance of the mean expression of the markers in the principal component analysis.



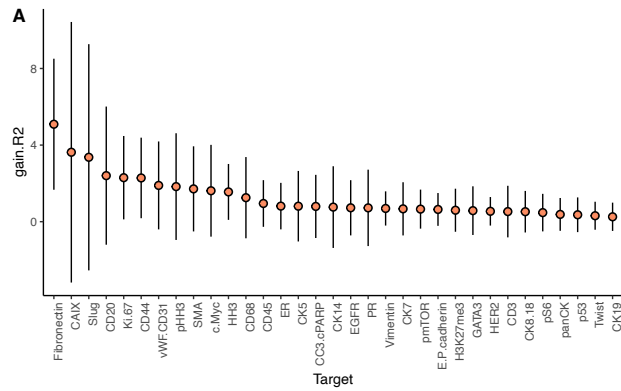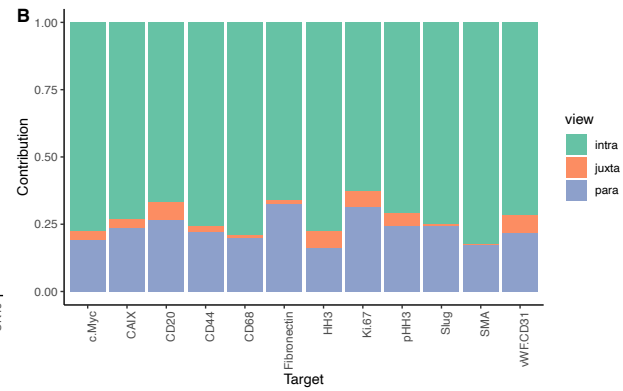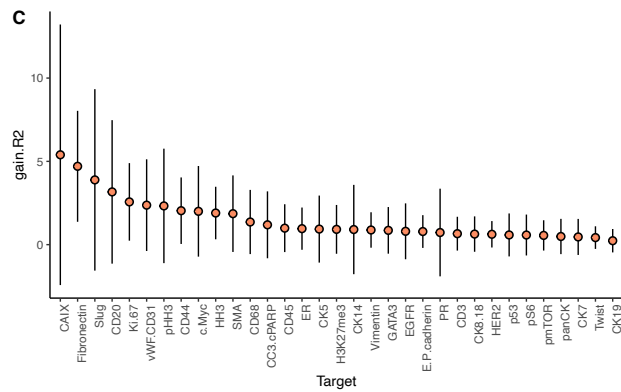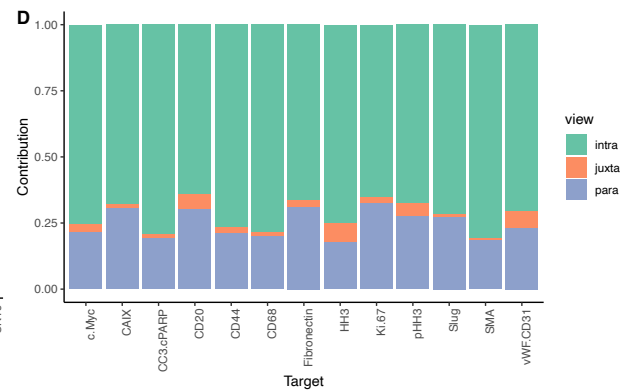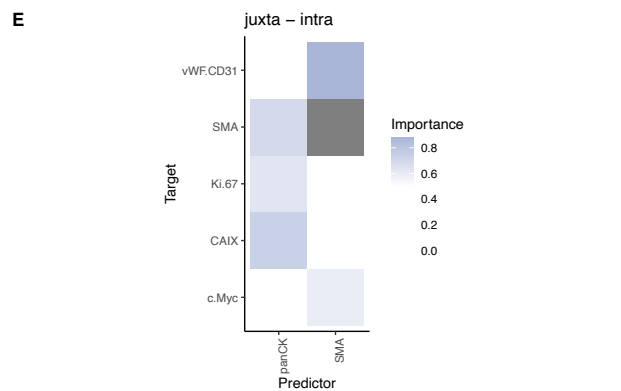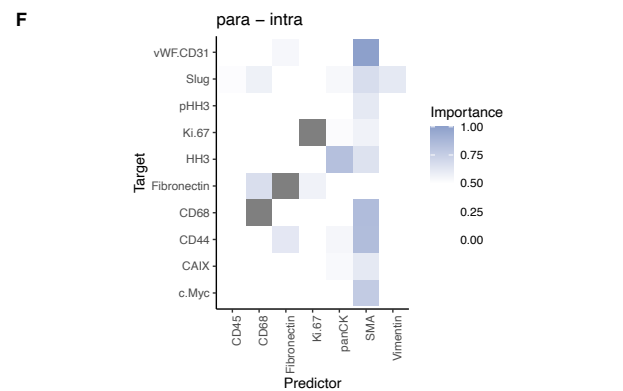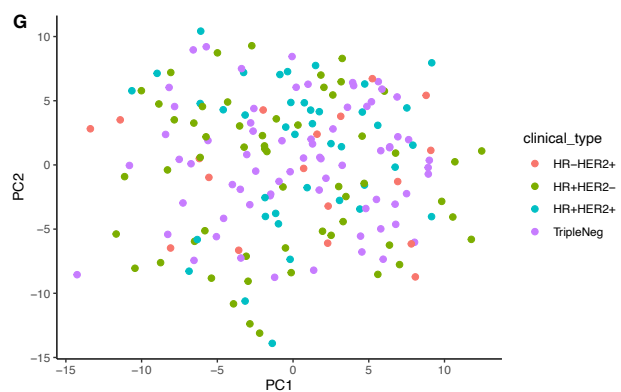

**Fig. S7. Performance, view contribution and contrasts of IMC data from 415 breast cancer samples.** (A) Improvement in the predictive performance (variance explained) for all samples when considering multiple views in contrast to a single, intraview (in absolute percentage points). (B) The relative contribution of each view to the prediction of the expression of the markers across all samples. (C) Improvement in the predictive performance (variance explained) for grade 3 samples when considering multiple views in contrast to a single, intraview (in absolute percentage points). (D) The relative contribution of each view to the prediction of the expression of the markers across grade 3 samples. (E) Intragroup contrast of importances of marker expression as predictors of the expression of each target marker between the juxtaview and intraview and (F) paraview and intraview for grade 3 samples. (G) First two principal components of the importance signature of the samples colored by clinical subtype.

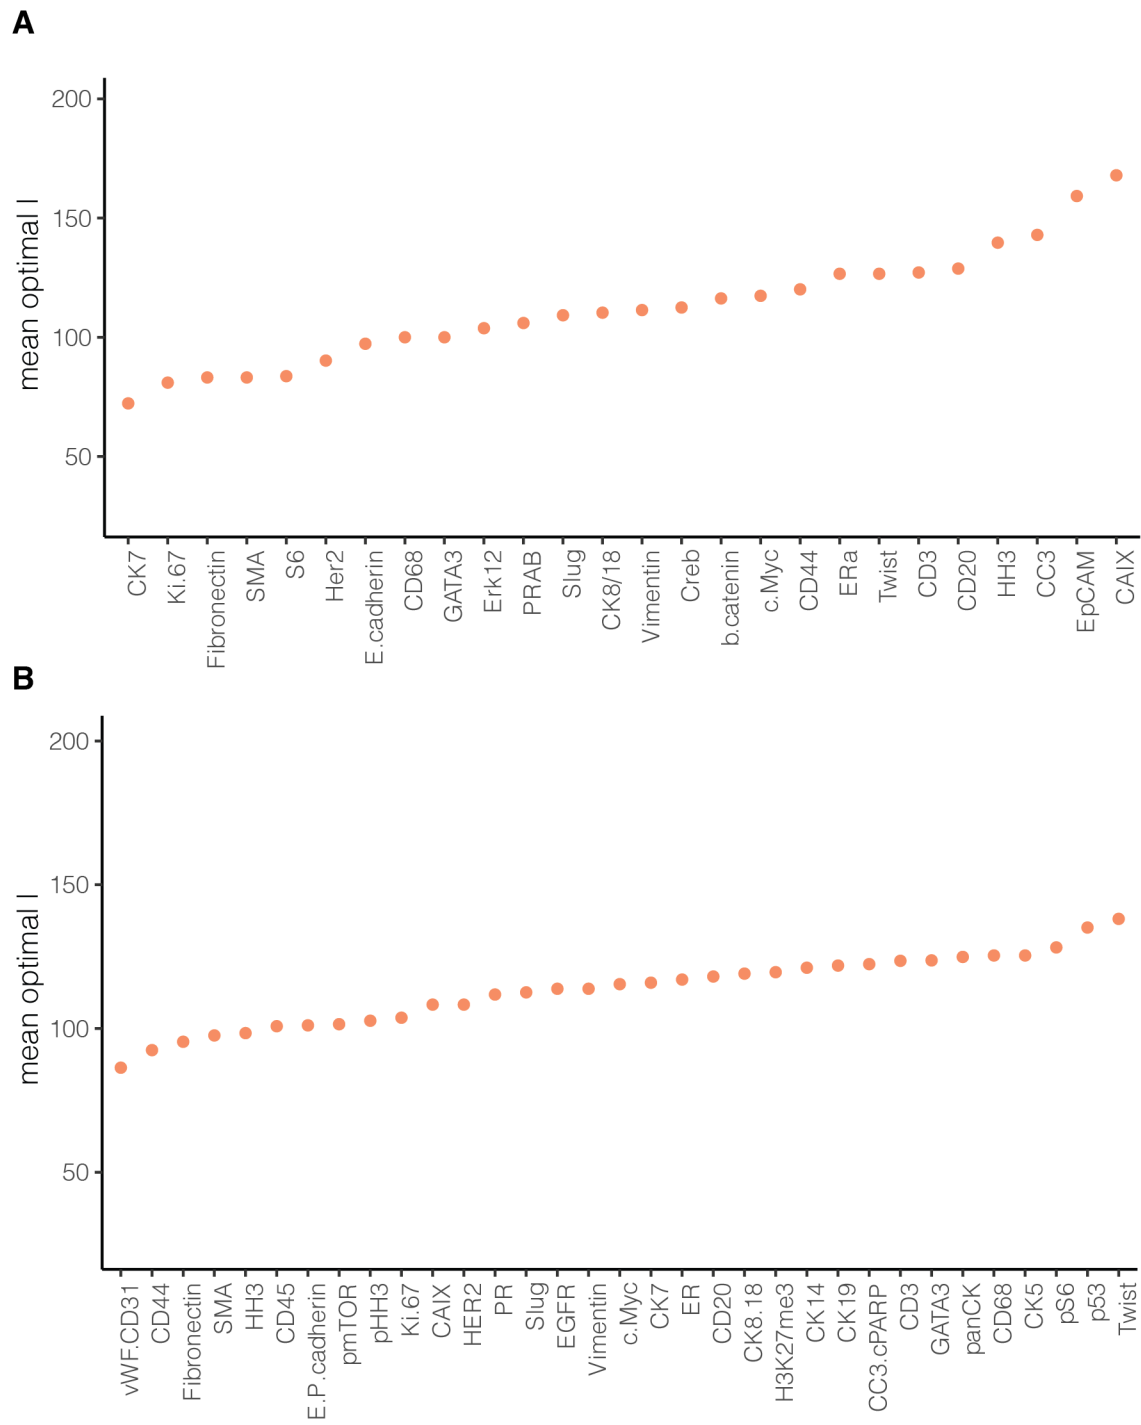

**Fig. S8.** Estimated optimal value for the parameter  $I$  (A) for the IMC data from 46 breast cancer samples and (B) for the IMC data from 415 breast cancer samples.

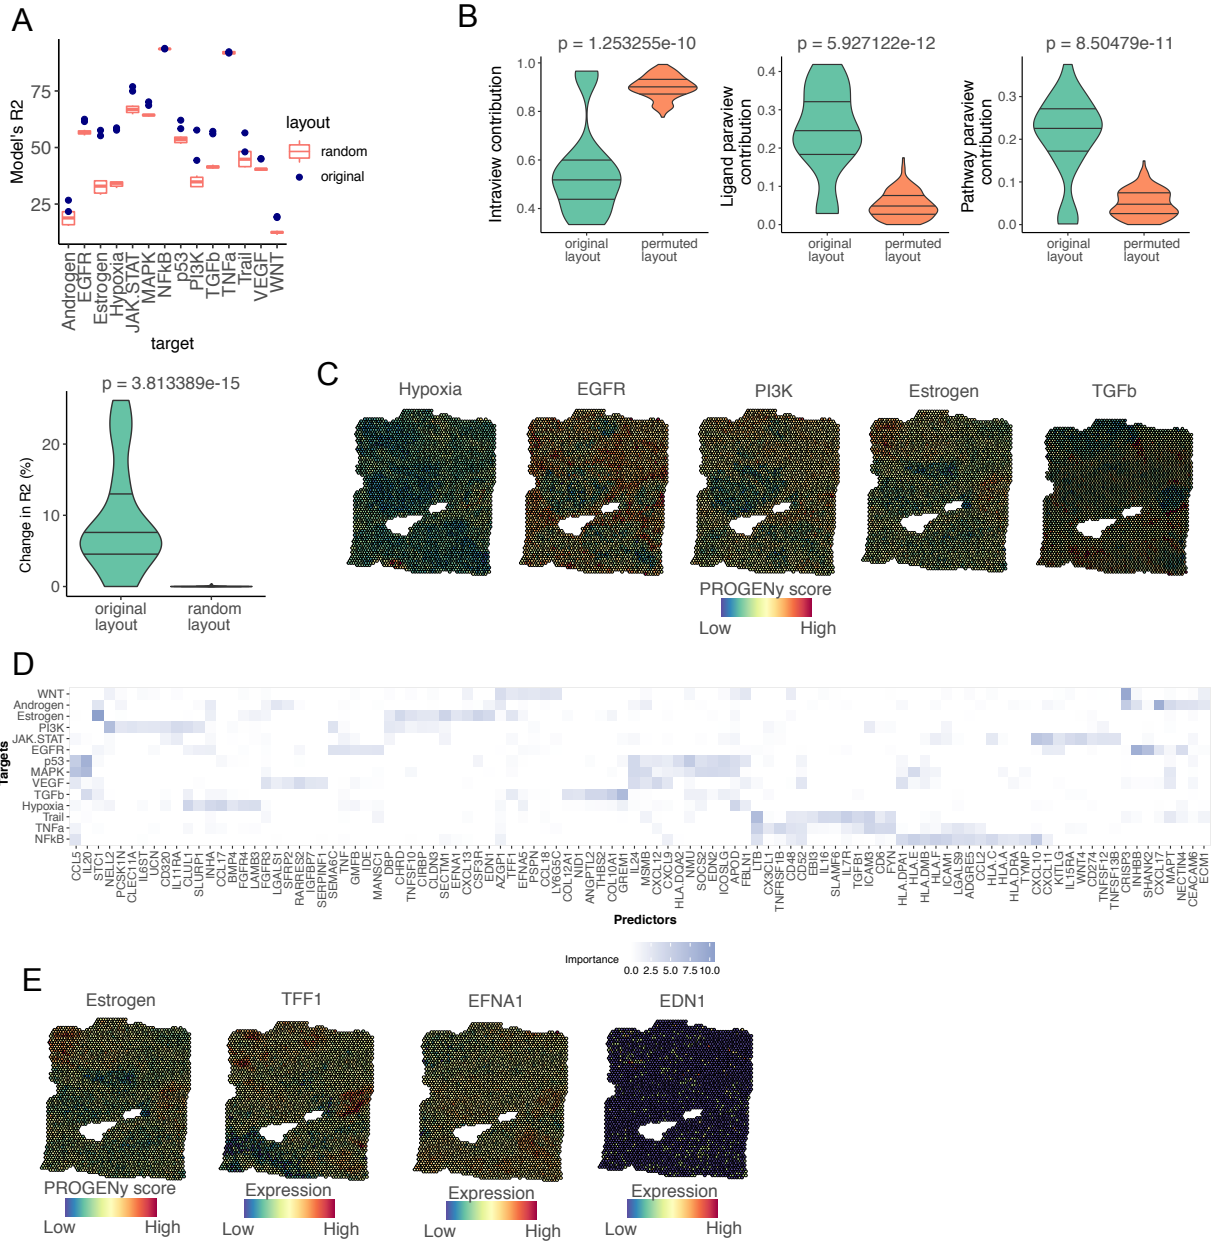

**Fig. S9. Application of MISTy to a spatial transcriptomics dataset.** (A) Comparison of MISTy's performance between original slides and a collection of 10 random slides with permuted coordinates. Differences of the R<sup>2</sup> of the multiview model (upper panel) and changes in R<sup>2</sup> between single and multiview models of both classes of models; (B) Differences in view contributions of all predicted markers between models fitted to original or permuted data. (C) Spatial distribution of pathway activities of Hypoxia and its top predictors in the paraview: EGFR, PI3K, Estrogen, and TGFb (D) Variable importances for the ligand paraview. (E) Spatial distribution of Estrogen pathway activities and scaled gene expression of TFF1, EFNA1, and EDN1 (additional top predictors in the ligand paraview).

**Table S1. Comparison of methods.** Methods that can be used to analyze spatially multiplex data, including their requirements.

| Method                                   | Model                                                                                   | Brief description                                                                                                                                                                                                                                                                 | Technologies                               |                                                   |
|------------------------------------------|-----------------------------------------------------------------------------------------|-----------------------------------------------------------------------------------------------------------------------------------------------------------------------------------------------------------------------------------------------------------------------------------|--------------------------------------------|---------------------------------------------------|
| spatialDE[23], SPARK[21], trendsceek[22] | Various (Gaussian processes, Generalized spatial linear models, Marked point processes) | Discovery of spatial patterns of expression of individual markers.                                                                                                                                                                                                                | all                                        |                                                   |
| histoCAT[31], Giotto[32]                 | Permutation test                                                                        | These approaches provide insights into statistically significant structural interactions of pairs of cell types limited to the immediate neighborhood.                                                                                                                            | all                                        |                                                   |
| SVCA[35]                                 | Gaussian Processes                                                                      | Identification of contributions of different spatial contexts to expression of markers by decomposing the source of variation to three fixed spatial contexts: intrinsic, environmental and intercellular effects.                                                                | all                                        |                                                   |
| GCNG[33]                                 | Graph Convolutional Neural Networks                                                     | Prediction of a relationship between the expression of pairs of genes from graphs of neighborhoods and expression profiles. The model is specific to the task of detection of ligand-receptor interactions. The model requires training with a labeled data of true interactions. | Spatial transcriptomics                    |                                                   |
| MESSI[34]                                | Mixture of experts                                                                      | Prediction of a relationship between the expression of a specific set of genes coding for ligands and receptors. The model takes into account the immediate neighborhood and the specific ligand or receptor genes for the specific cell type.                                    | Spatial transcriptomics                    |                                                   |
| MISTy                                    | Multi-view learning                                                                     | Explainable machine learning framework for extracting general structural and functional relationships from any spatial omics data.                                                                                                                                                | all                                        |                                                   |
|                                          |                                                                                         |                                                                                                                                                                                                                                                                                   |                                            |                                                   |
|                                          | <b>Flexibility of spatial contexts</b>                                                  | <b>Dependencies between markers</b>                                                                                                                                                                                                                                               | <b>Task specific</b>                       | <b>Estimate contributions of spatial contexts</b> |
| spatialDE, SPARK, trendsceek             | no                                                                                      | no                                                                                                                                                                                                                                                                                | yes (individual spatial pattern detection) | no                                                |
| histoCAT, Giotto                         | no (immediate neighborhood)                                                             | yes (paired)                                                                                                                                                                                                                                                                      | yes (neighborhood composition)             | no                                                |
| SVCA                                     | yes (fixed three)                                                                       | no                                                                                                                                                                                                                                                                                | no                                         | yes                                               |
| GCNG                                     | no (immediate neighborhood)                                                             | yes (paired)                                                                                                                                                                                                                                                                      | yes (ligand-receptor analysis)             | no                                                |

|                                   |                                                              |                                                                |                                                              |                                                                |
|-----------------------------------|--------------------------------------------------------------|----------------------------------------------------------------|--------------------------------------------------------------|----------------------------------------------------------------|
| MESSI                             | no (immediate neighborhood)                                  | yes (paired)                                                   | yes (ligand-receptor analysis)                               | no                                                             |
| <b>MISTy</b>                      | flexible                                                     | yes (multivariate and non linear)                              | no                                                           | yes                                                            |
| <b>Minimum input requirements</b> |                                                              |                                                                |                                                              |                                                                |
|                                   | <b>Marker expression</b>                                     | <b>Spatial coordinates</b>                                     | <b>Cell-type annotation</b>                                  | <b>Additional</b>                                              |
| spatialDE, SPARK, trendsceek      | yes                                                          | yes                                                            | no                                                           | no                                                             |
| histoCAT, Giotto                  | yes                                                          | yes                                                            | yes                                                          | no                                                             |
| SVCA                              | yes                                                          | yes                                                            | no                                                           | no                                                             |
| GCNG                              | yes                                                          | yes                                                            | no                                                           | ground truth ligand-receptor interactions                      |
| MESSI                             | yes                                                          | yes                                                            | yes                                                          | cell type specific ligand and receptor coding genes            |
| <b>MISTy</b>                      | yes                                                          | yes                                                            | no                                                           | no                                                             |
| <b>Flexibility of analyses</b>    |                                                              |                                                                |                                                              |                                                                |
|                                   | <b>Structural interactions in the immediate neighborhood</b> | <b>Structural interactions in the broader tissue structure</b> | <b>Functional interactions in the immediate neighborhood</b> | <b>Functional interactions in the broader tissue structure</b> |
| spatialDE, SPARK, trendsceek      | no                                                           | no                                                             | no                                                           | no                                                             |
| histoCAT, Giotto                  | yes                                                          | no                                                             | yes(indirect through cell type annotations)                  | no                                                             |
| SVCA                              | yes                                                          | yes                                                            | no                                                           | no                                                             |
| GCNG                              | no                                                           | no                                                             | yes (specific)                                               | no                                                             |
| MESSI                             | no                                                           | no                                                             | yes (specific)                                               | no                                                             |
| <b>MISTy</b>                      | yes                                                          | yes                                                            | yes                                                          | yes                                                            |

**Table S2.** Significant correlation ( $p \leq 0.05$ ) of estimated importances to overall survivability for triple negative samples from the IMC data with 415 breast cancer samples.

| Predictor-Target | View  | Spearman correlation | p-value correlation | p-value log rank test |
|------------------|-------|----------------------|---------------------|-----------------------|
| CC3.cPARP-EGFR   | intra | 0.606                | 0.003               | 0.033                 |
| Twist-HH3        | intra | -0.595               | 0.004               | 0.000                 |
| Vimentin-HH3     | intra | -0.588               | 0.005               | 0.023                 |
| Vimentin-EGFR    | para  | -0.587               | 0.005               | 0.005                 |
| SMA-pHH3         | juxta | -0.582               | 0.005               | 0.079                 |
| Fibronectin-Slug | juxta | 0.578                | 0.006               | 0.431                 |
| CC3.cPARP-Slug   | intra | 0.577                | 0.006               | 0.198                 |
| CK8.18-CC3.cPARP | juxta | -0.574               | 0.006               | 0.002                 |
| pS6-EGFR         | intra | 0.563                | 0.007               | 0.092                 |
| CD20-SMA         | para  | 0.563                | 0.007               | 0.178                 |
| CD44-GATA3       | intra | 0.554                | 0.008               | 0.361                 |
| CD45-CD68        | juxta | 0.548                | 0.009               | 0.029                 |
| Vimentin-Ki.67   | juxta | -0.546               | 0.010               | 0.009                 |
| H3K27me3-CAIX    | para  | -0.540               | 0.010               | 0.003                 |
| CD45-ER          | para  | 0.540                | 0.010               | 0.010                 |
| Vimentin-CK8.18  | juxta | -0.537               | 0.011               | 0.014                 |
| ER-c.Myc         | para  | 0.532                | 0.012               | 0.041                 |
| HER2-Fibronectin | juxta | 0.531                | 0.012               | 0.059                 |
| CC3.cPARP-CAIX   | intra | 0.530                | 0.012               | 0.036                 |
| CK8.18-Vimentin  | para  | -0.528               | 0.013               | 0.001                 |
| SMA-CD20         | para  | 0.527                | 0.013               | 0.033                 |
| CD20-GATA3       | juxta | -0.522               | 0.014               | 0.051                 |
| pS6-Fibronectin  | intra | 0.517                | 0.015               | 0.230                 |
| CD20-GATA3       | intra | -0.514               | 0.015               | 0.051                 |
| HH3-CD45         | juxta | 0.514                | 0.015               | 0.433                 |
| CD3-CD45         | para  | 0.506                | 0.017               | 0.416                 |
| PR-vWF.CD31      | intra | 0.503                | 0.018               | 0.103                 |
| CK7-EGFR         | intra | -0.496               | 0.020               | 0.028                 |

|                      |       |        |       |       |
|----------------------|-------|--------|-------|-------|
| Vimentin-c.Myc       | juxta | 0.488  | 0.022 | 0.008 |
| H3K27me3-Fibronectin | intra | -0.485 | 0.023 | 0.175 |
| c.Myc-CK5            | para  | -0.484 | 0.024 | 0.057 |
| CD20-pHH3            | para  | 0.482  | 0.025 | 0.055 |
| HER2-Ki.67           | intra | 0.481  | 0.025 | 0.441 |
| CC3.cPARP-GATA3      | intra | 0.479  | 0.025 | 0.005 |
| E.P.cadherin-pHH3    | juxta | 0.478  | 0.026 | 0.003 |
| CD20-Fibronectin     | para  | 0.478  | 0.026 | 0.076 |
| CD44-EGFR            | intra | -0.471 | 0.028 | 0.474 |
| H3K27me3-GATA3       | para  | 0.466  | 0.030 | 0.280 |
| H3K27me3-CK8.18      | intra | -0.462 | 0.032 | 0.008 |
| CAIX-EGFR            | intra | 0.462  | 0.032 | 0.021 |
| c.Myc-GATA3          | intra | -0.459 | 0.033 | 0.045 |
| ER-CD44              | intra | 0.459  | 0.033 | 0.046 |
| pS6-Ki.67            | intra | 0.459  | 0.033 | 0.076 |
| panCK-SMA            | para  | -0.459 | 0.033 | 0.028 |
| panCK-CK14           | juxta | 0.457  | 0.034 | 0.009 |
| CD45-Slug            | intra | -0.456 | 0.034 | 0.083 |
| Ki.67-EGFR           | intra | -0.455 | 0.035 | 0.143 |
| CD44-SMA             | para  | 0.455  | 0.035 | 0.216 |
| SMA-HH3              | intra | -0.453 | 0.035 | 0.000 |
| ER-CK14              | juxta | -0.452 | 0.036 | 0.002 |
| CAIX-CD20            | para  | -0.452 | 0.036 | 0.319 |
| CK14-GATA3           | juxta | 0.449  | 0.037 | 0.377 |
| vWF.CD31-ER          | para  | 0.447  | 0.038 | 0.118 |
| EGFR-Slug            | intra | 0.444  | 0.040 | 0.479 |
| H3K27me3-CAIX        | juxta | -0.443 | 0.040 | 0.003 |
| panCK-SMA            | juxta | -0.441 | 0.041 | 0.028 |
| CD44-CD45            | para  | 0.441  | 0.041 | 0.009 |
| CD45-CAIX            | para  | 0.440  | 0.042 | 0.340 |
| CK19-Vimentin        | para  | 0.440  | 0.042 | 0.086 |



|            |       |        |       |       |
|------------|-------|--------|-------|-------|
| PR-c.Myc   | juxta | -0.438 | 0.043 | 0.321 |
| CK7-pHH3   | juxta | 0.434  | 0.045 | 0.061 |
| pmTOR-Slug | intra | 0.433  | 0.045 | 0.016 |
| pS6-HH3    | intra | 0.430  | 0.047 | 0.041 |
| pHH3-CAIX  | para  | -0.429 | 0.048 | 0.002 |
